# Supplementary material
Source: publisher figshare collection journal article supplement (https://acs.figshare.com/ndownloader/files/4008847)
Supplement: Supplementary file 1 [file 4008847]

**Wide-band Excited  $\text{Y}_6(\text{WMo})_{0.5}\text{O}_{12}:\text{Eu}$  Red Phosphor for WLED:  
Structure Evolution, Photoluminescence Properties and Energy  
Transfer Mechanisms Involved**

Huaiyong Li<sup>1\*</sup>, Hyeon Mi Noh<sup>2</sup>, Byung Kee Moon<sup>2</sup>, Byung Chun Choi<sup>2</sup>, Jung Hyun Jeong<sup>2\*</sup>, Kiwan Jang<sup>3</sup>, Ho Sueb Lee<sup>3</sup> and Soung Soo Yi<sup>4</sup>

<sup>1</sup>Department of Materials Science and Engineering, Liaocheng University, Liaocheng 252059, P. R. China

<sup>2</sup>Department of Physics, Pukyong National University, Busan 608-737, Korea

<sup>3</sup>Department of Physics, Changwon National University, Changwon 641-773, Korea

<sup>4</sup>Department of Electronic Material Engineering, Silla University, Busan 617-736, Korea

\*Email: [huaiyong.lee@gmail.com](mailto:huaiyong.lee@gmail.com), [jhjeong@pknu.ac.kr](mailto:jhjeong@pknu.ac.kr), Fax: +82-51-629-5549

### Supporting Information:

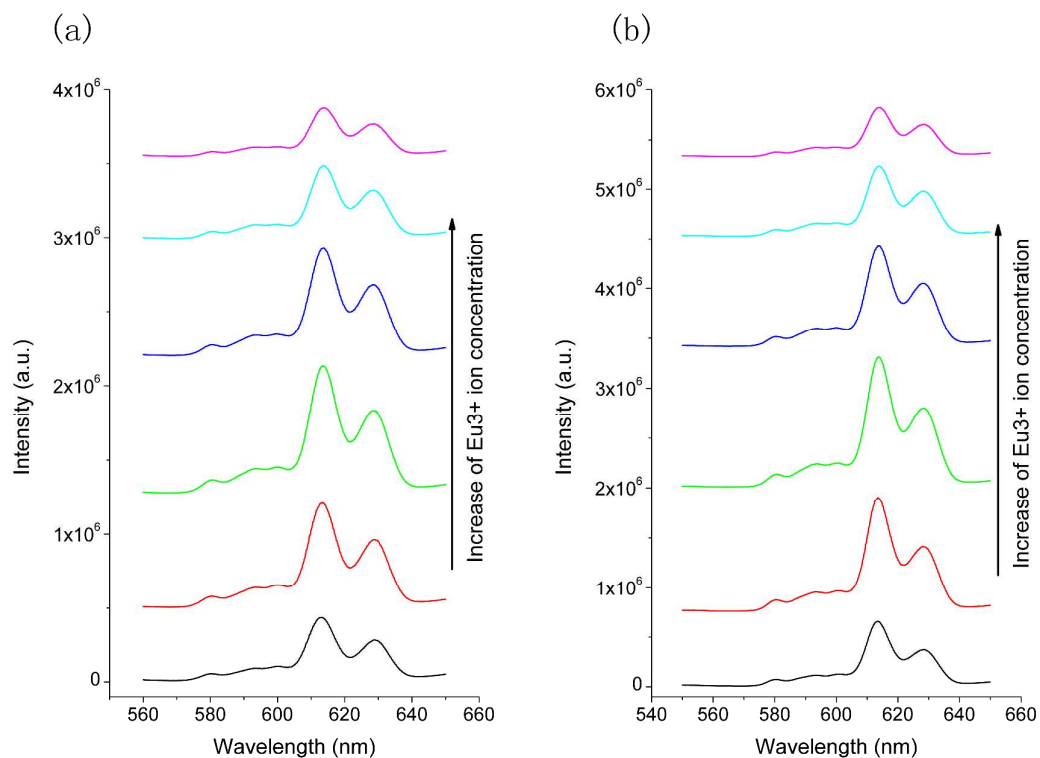

Figure S1. PL emission spectra of YWMO:Eu(2.5%)-800 containing different  $\text{Eu}^{3+}$  ion concentrations after excited at (a) 350 nm, and (b) 466.5 nm.

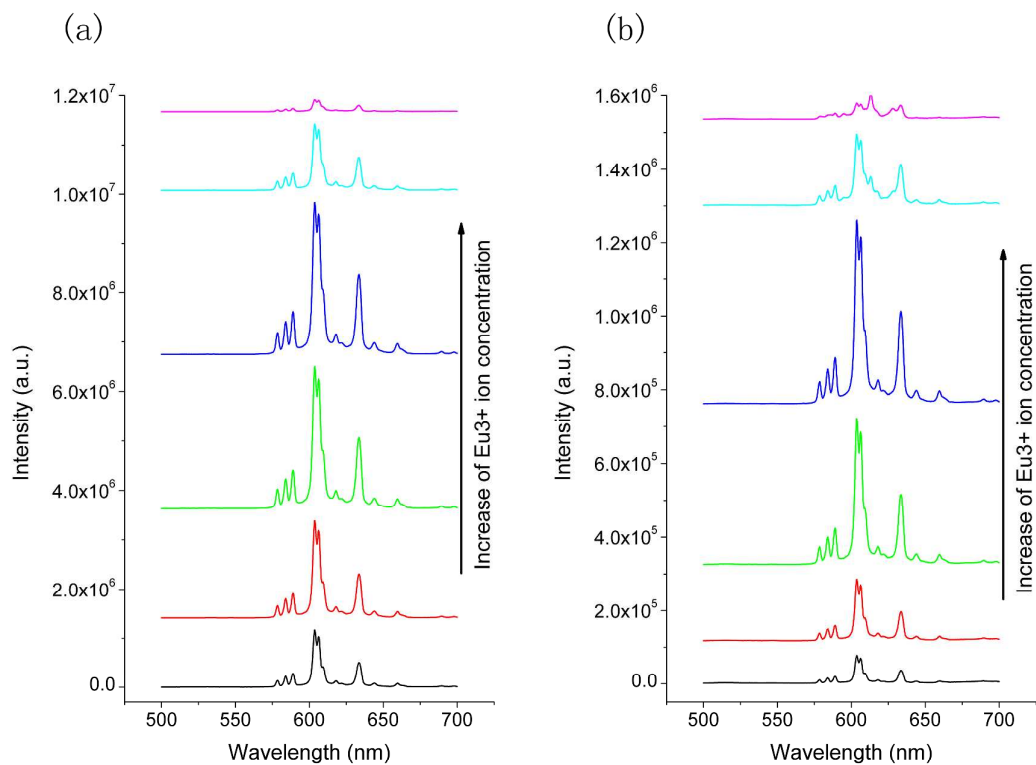

Figure S2. PL emission spectra of YWMO:Eu(2.5%)-1300 containing different  $\text{Eu}^{3+}$  ion concentrations after excited at (a) 399 nm, and (b) 466.5 nm.
